# Supplementary material for: Removal of meropenem from environmental matrices by electrochemical oxidation using Co/Bi/TiO2 nanotube electrodes
Source: Royal Society of Chemistry journal article supplement (doi:10.1039/d0ew00184h), 2020-01-01
Supplement: d0ew00184h1.pdf [file d0ew00184h1.pdf]

**Removal of Meropenem from Environmental Matrices by Electrochemical Oxidation using  
Co/Bi/TiO<sub>2</sub> Nanotube Electrodes**

**Amir Ahmadi,<sup>†</sup> Bernhard Vogler,<sup>‡</sup> Yang Deng,<sup>§</sup> and Tingting Wu<sup>†\*</sup>**

<sup>†</sup> Department of Civil and Environmental Engineering, The University of Alabama in Huntsville

<sup>‡</sup> Department of Chemistry, The University of Alabama in Huntsville

Huntsville, AL, 35899, USA

<sup>§</sup> Department of Earth and Environmental Studies, Montclair State University

Montclair, NJ, 07043, USA

\* Corresponding author: Tel: +1-256-824-6423; email: [Tingting.Wu@uah.edu](mailto:Tingting.Wu@uah.edu)

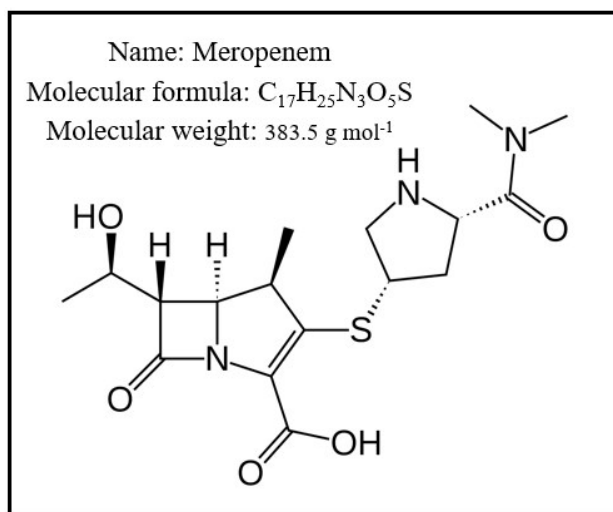

11

12 Figure S 1. Meropenem.

13

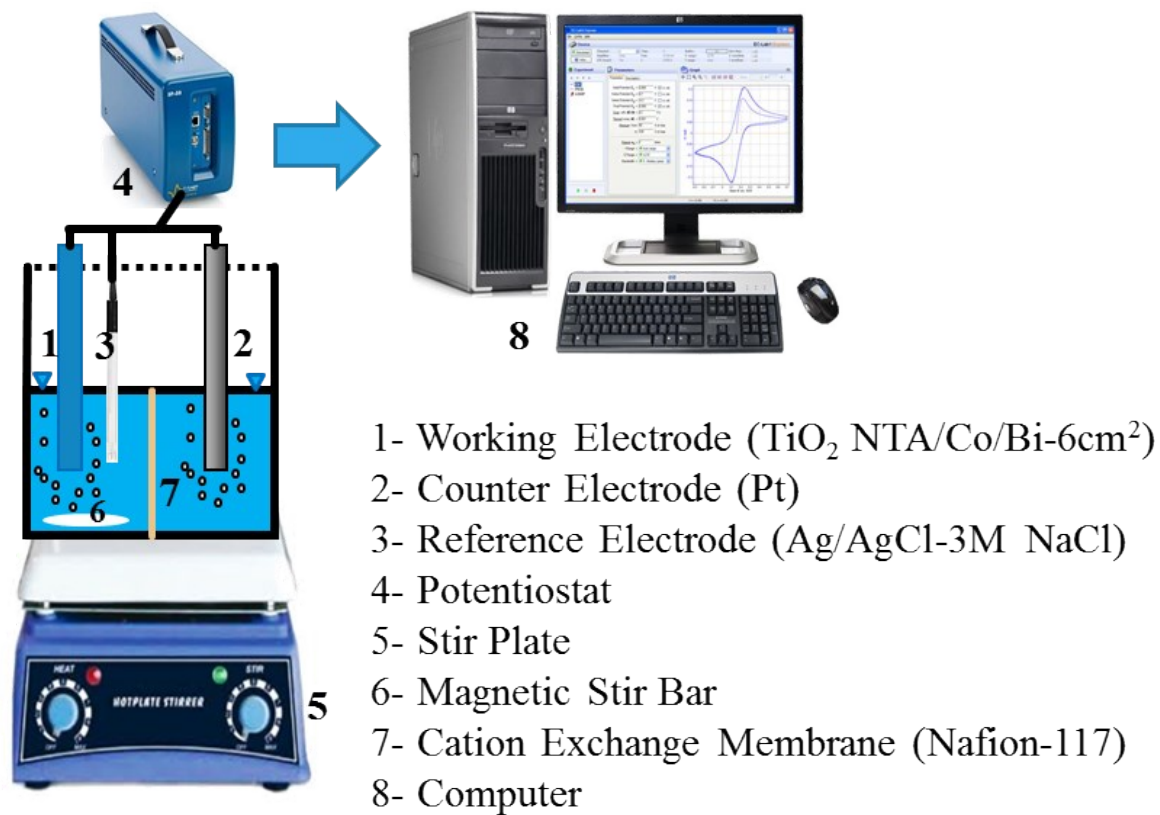

14

15 Figure S 2. Schematic diagram of the experimental setup.

16

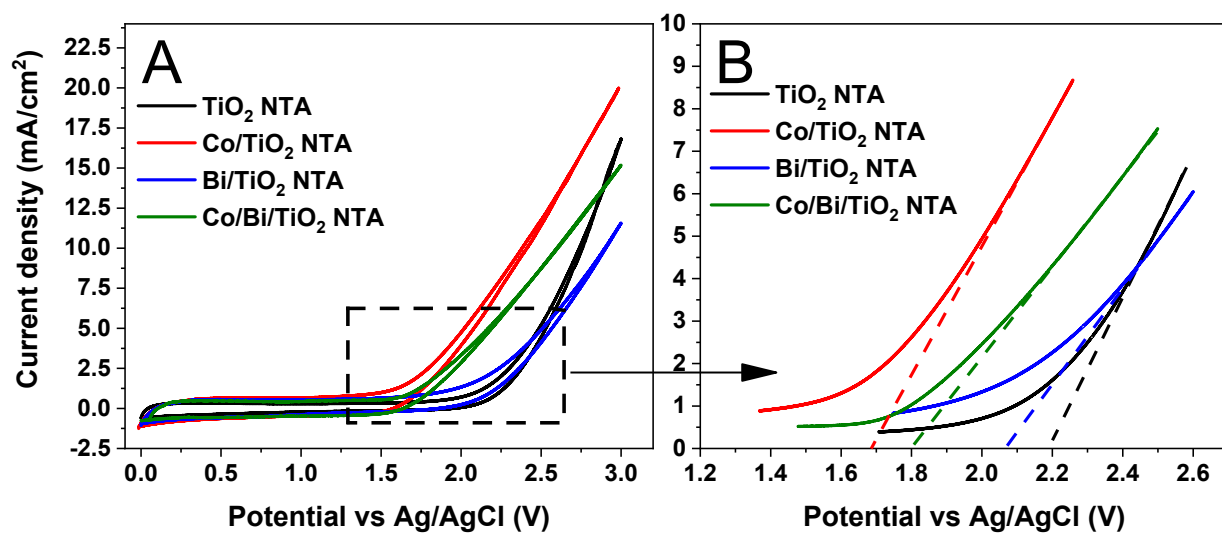

17

18

19 Figure S 3. Cyclic voltammetry of different TiO<sub>2</sub> NTA electrodes [Experimental conditions: 100  
20 mM NaClO<sub>4</sub>, Ag/AgCl (3 M NaCl) reference electrode].

21

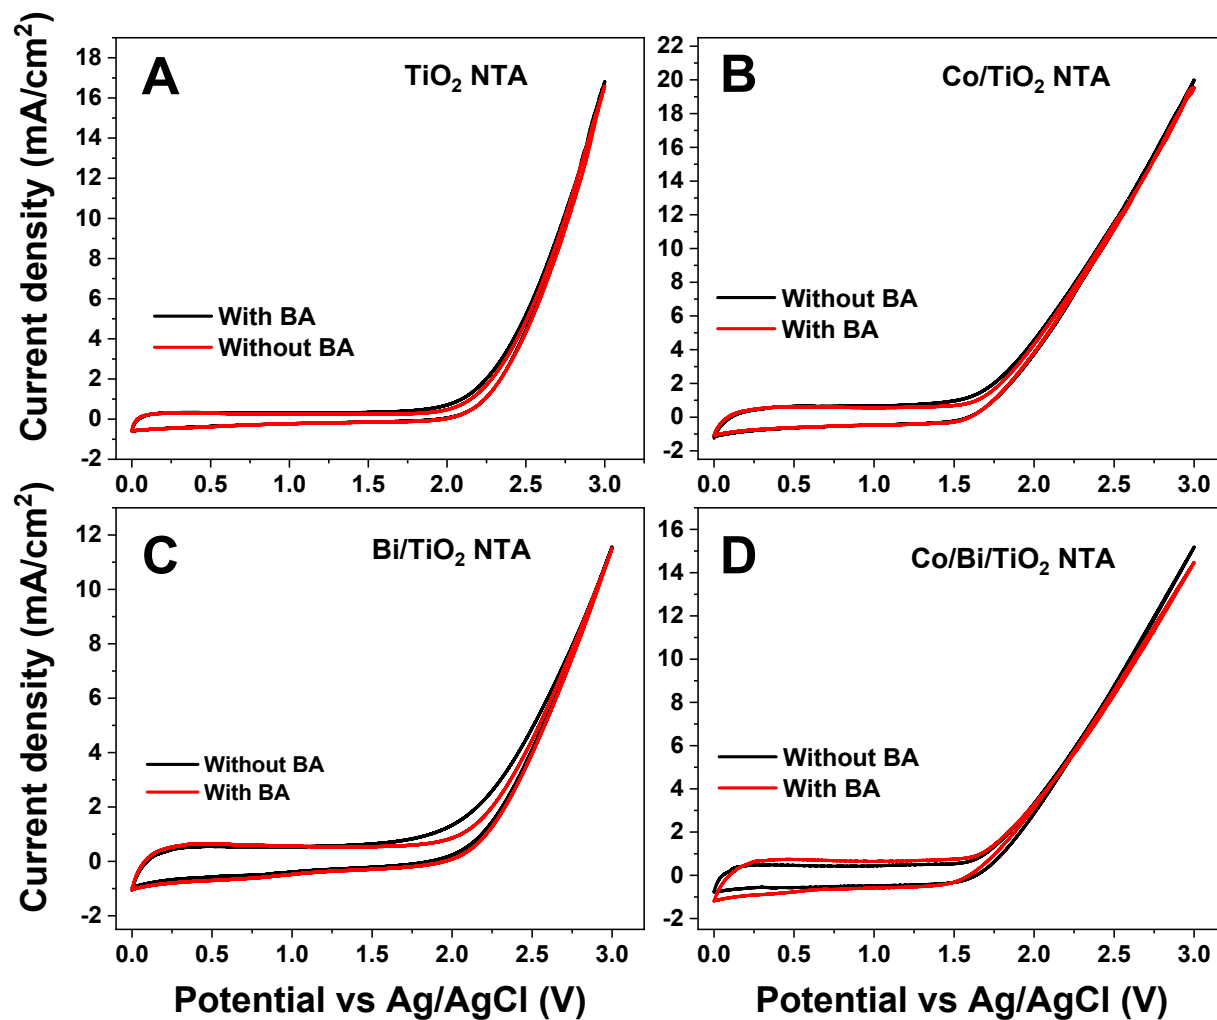

22  
23

24 Figure S 4. Direct oxidation of BA [Experimental conditions: 1 mM BA, 100 mM  $\text{NaClO}_4$ ,  
25 Ag/AgCl (3 M NaCl) reference electrode].

26

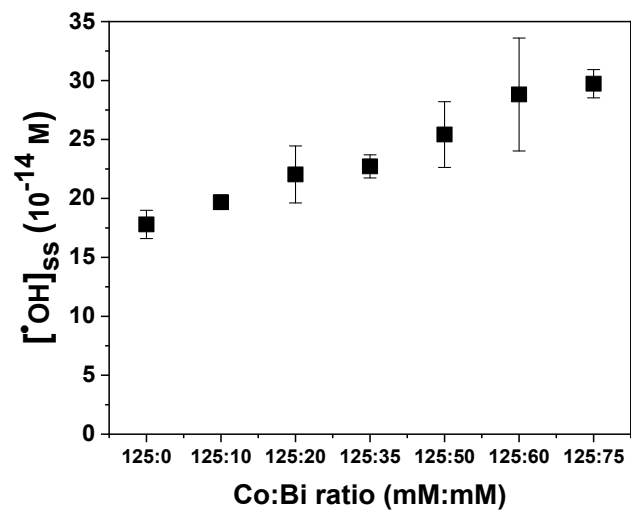

27

28 Figure S 5. [ $\bullet\text{OH}$ ]<sub>ss</sub> estimated from BA electrocatalytic degradation using Co/Bi/TiO<sub>2</sub> NTA  
 29 electrodes with different metal doping [Experimental conditions: 1 mM BA+100 mM NaClO<sub>4</sub>,  
 30 Ag/AgCl (3M NaCl) reference electrode].

31

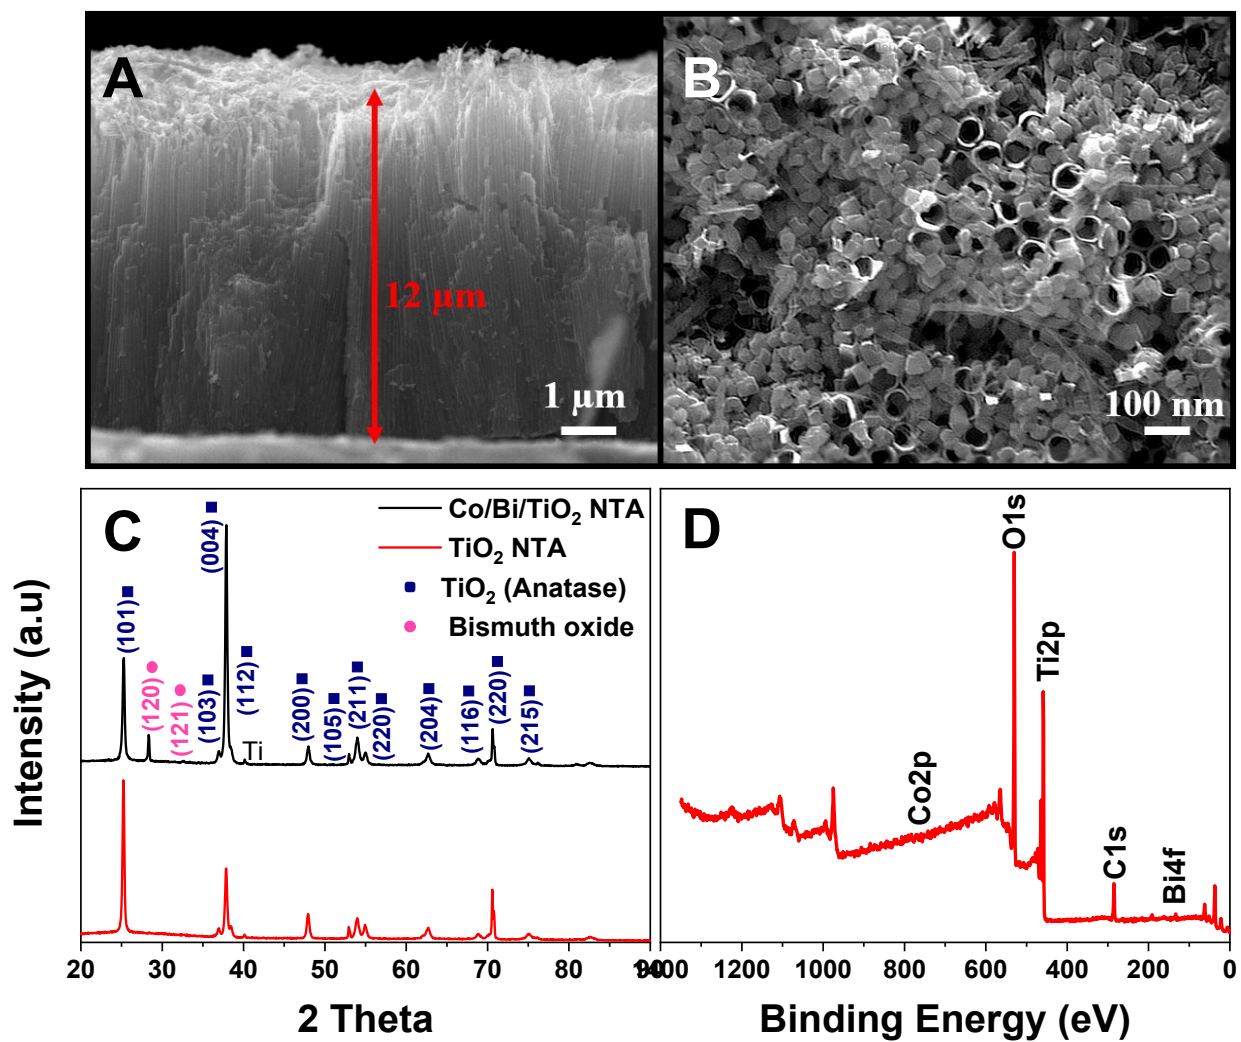

Figure S 6. A&B) SEM images; C&D) XRD and XPS spectra of Co/Bi/TiO<sub>2</sub> NTA electrodes, respectively.

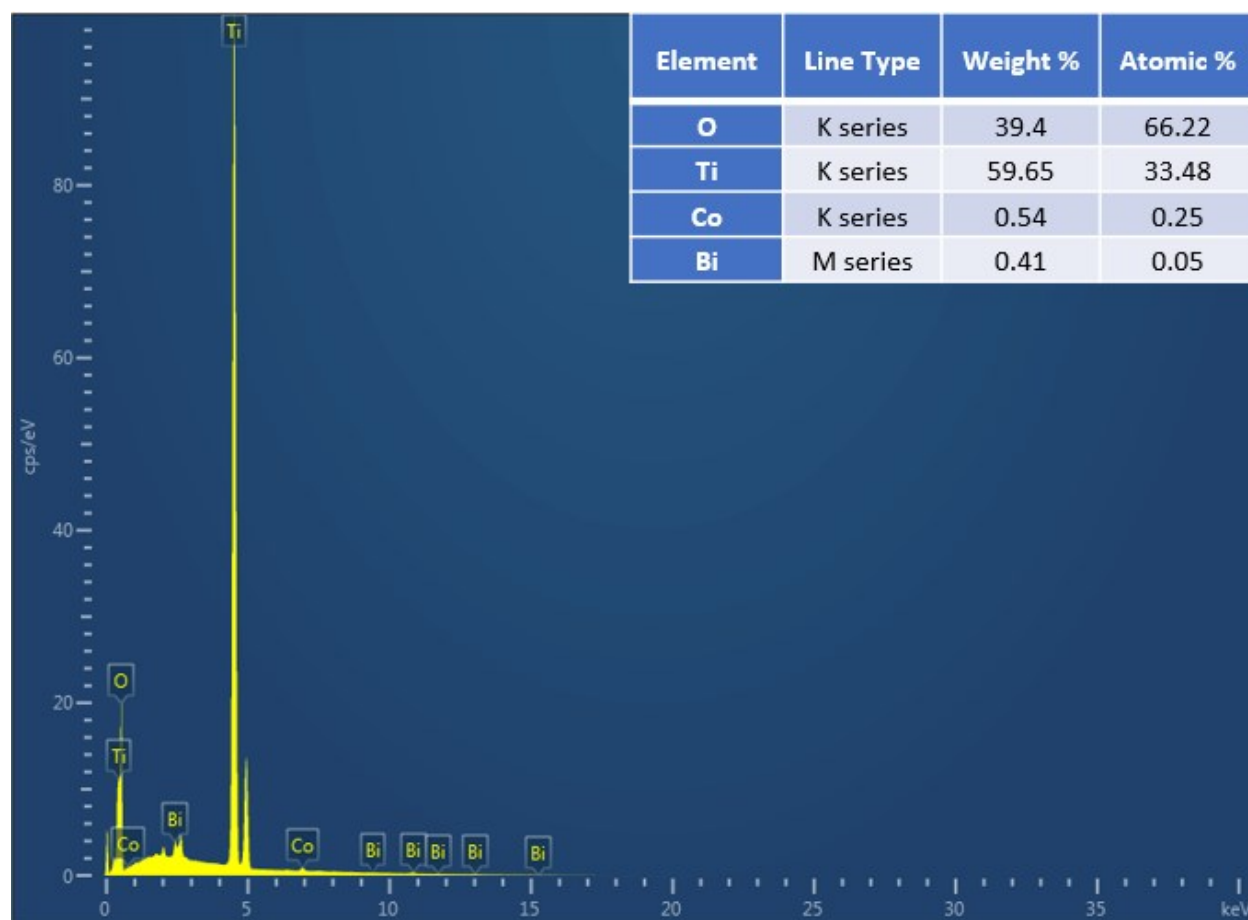

37

38 Figure S 7. EDX spectra of Co/Bi/TiO<sub>2</sub> NTA electrode.

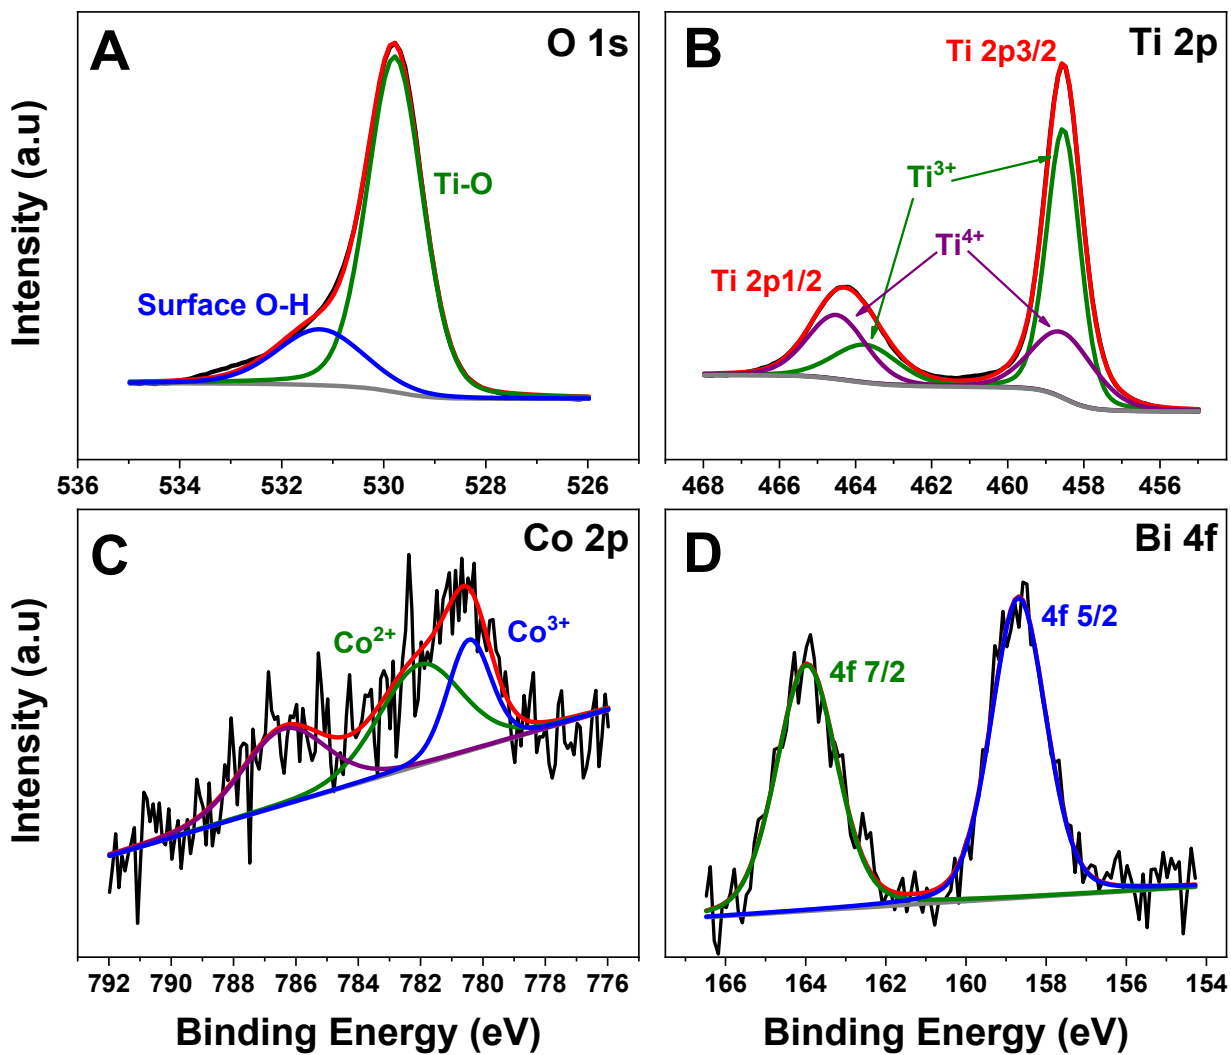

39  
40

41 Figure S 8. XPS spectra of Co/Bi/TiO<sub>2</sub> NTA electrode: A) O 1s, B) Ti 2p, C) Co 2p, D) Bi 4f.

42

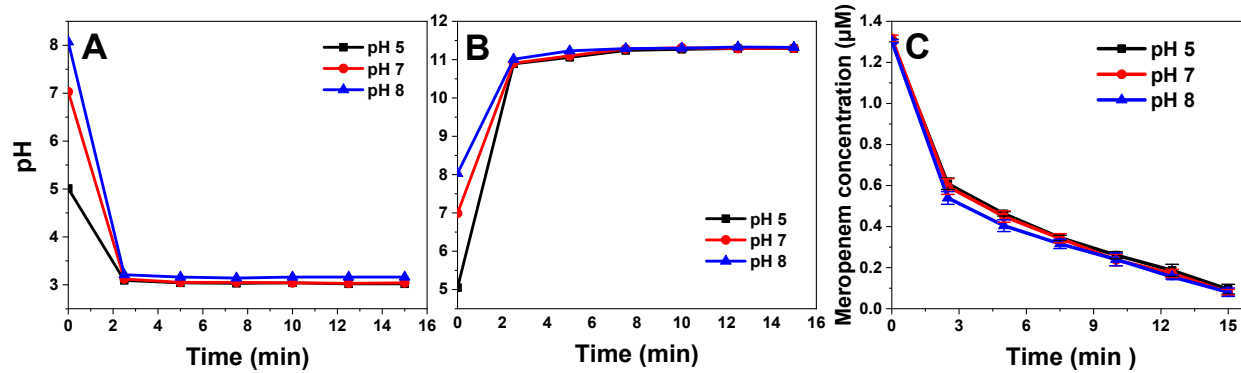

43  
44

45 Figure S 9. pH evolution in different reactor chambers during the experiments: A) anodic chamber,  
46 B) cathodic chamber; C) Effects of initial pH on Meropenem degradation [Experimental  
47 conditions: 10 mA/cm<sup>2</sup>, Ag/AgCl (3M NaCl) reference electrode].

48

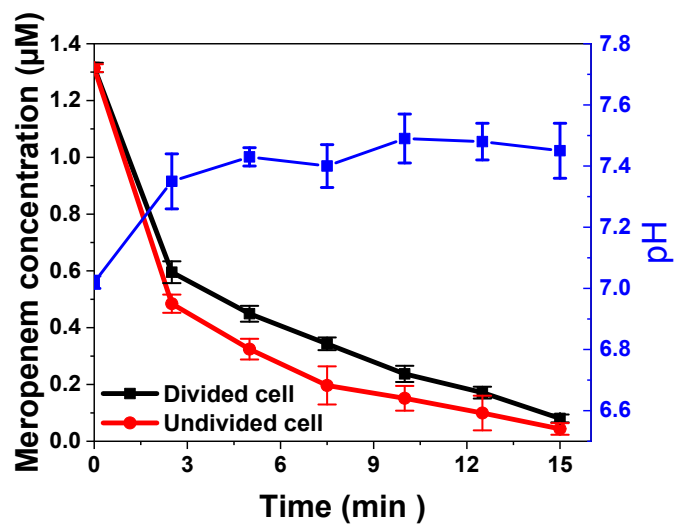

49

50 Figure S 10. Meropenem degradation in divided and undivided electrochemical cell using  
 51 Co/Bi/TiO<sub>2</sub> NTA electrode [Experimental condition: working electrode: Co/Bi/TiO<sub>2</sub> NTA;  
 52 counter electrode: Pt; applied current density: 10mA/cm<sup>2</sup>; pH:7; background electrolyte: 30 mM  
 53 NaClO<sub>4</sub>; Ag/AgCl (3M NaCl) reference electrode]

54

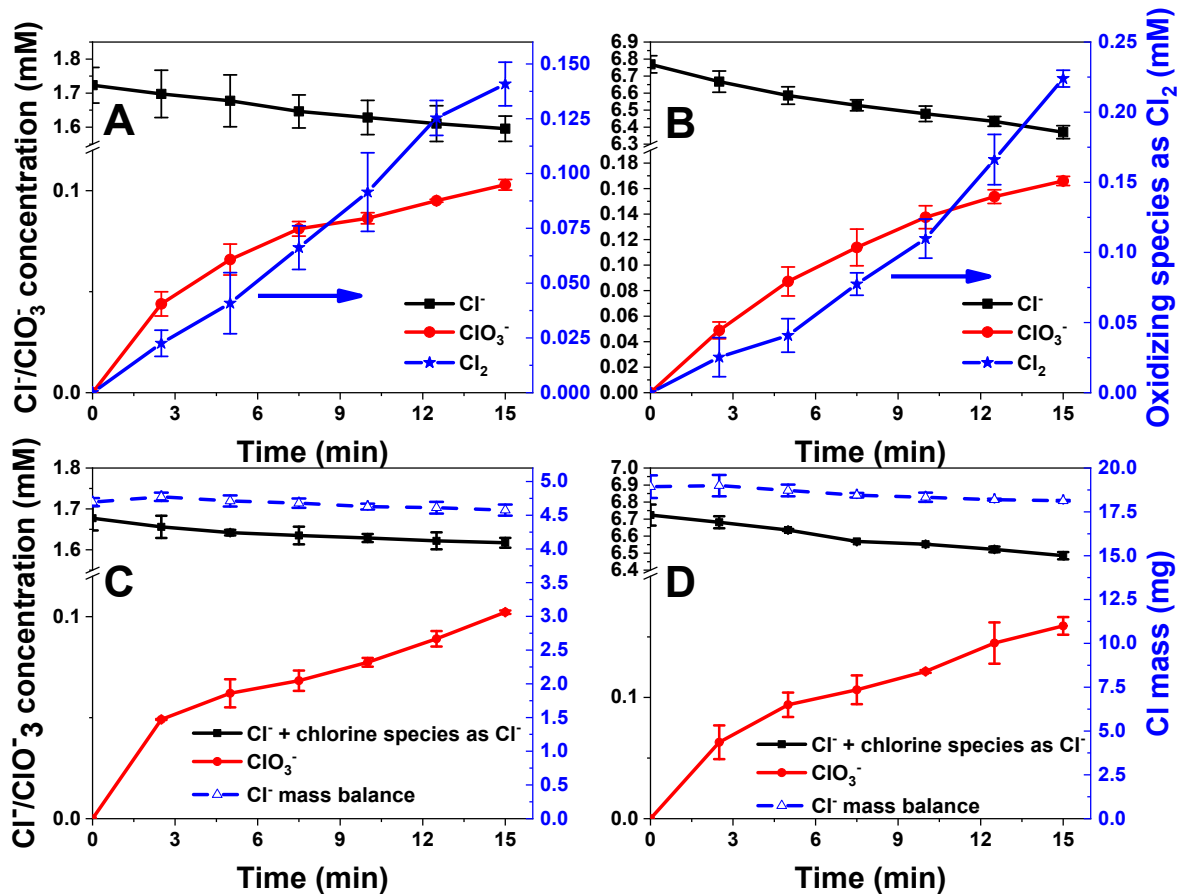

55  
56

57 Figure S 11. Chlorinated byproduct formation and Cl mass balance: A&C) 60 mg/L  $\text{Cl}^-$ , B&D)  
58 240 mg/L  $\text{Cl}^-$  [Experimental conditions: 10 mA/cm<sup>2</sup>, pH 7, 30 mM  $\text{Na}_2\text{SO}_4$ , Ag/AgCl (3M NaCl)  
59 as the reference electrode in A&B, Hg/HgO (20% KOH) as the reference electrode in C&D].

60

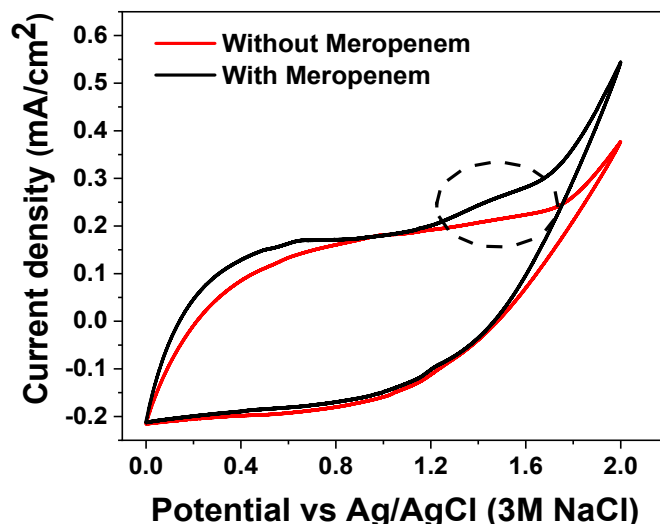

Figure S 12. Direct oxidation of Meropenem on the Co/Bi/TiO<sub>2</sub> NTA electrode [Experimental conditions: 5mg/L Meropenem, background electrolyte: 5 mM NaClO<sub>4</sub>, sweep rate: 25mV/s, Ag/AgCl (3 M NaCl) reference electrode].

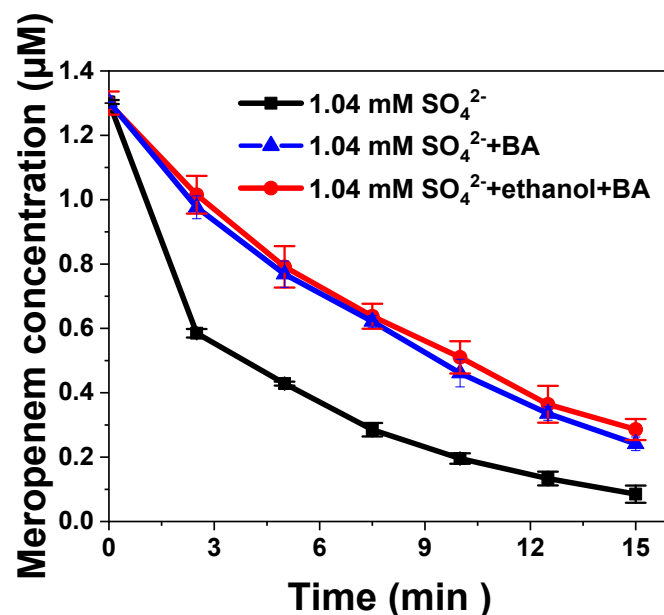

76

77 Figure S 13. Meropenem degradation in the presence and absence of scavengers [[Experimental  
 78 conditions: 100 mg/L  $\text{SO}_4^{2-}$ , 100 mM ethanol, 1 mM BA, 10 mA/cm<sup>2</sup>, pH 7, Ag/AgCl (3M NaCl)  
 79 reference electrode].

80

81

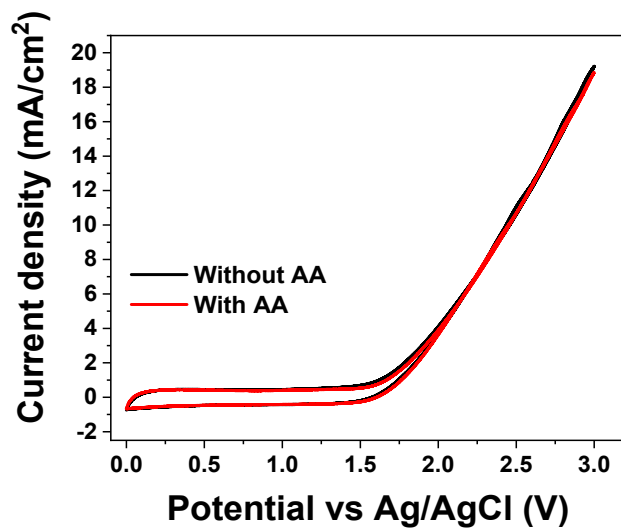

82

83 Figure S 14. Direct oxidation of AA, bicarbonate, and TBA [Experimental conditions: 100 mM  
 84 NaClO<sub>4</sub> A) 100 mM AA, B) 50 mM HCO<sub>3</sub><sup>-</sup>, C) 100 mM TBA Ag/AgCl (3 M NaCl) reference  
 85 electrode].

86

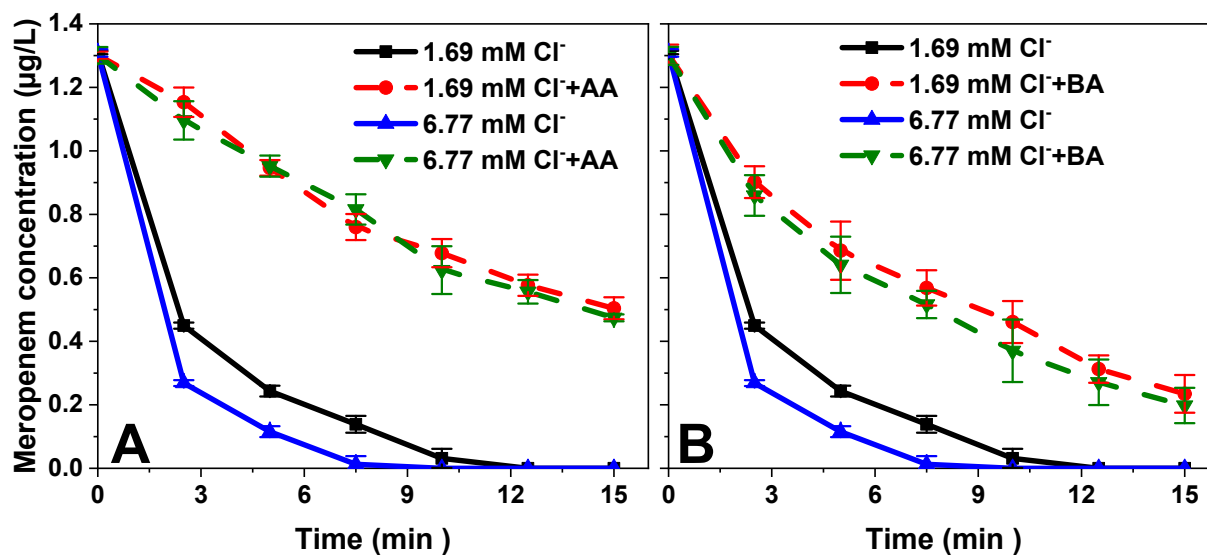

87  
88

89 Figure S 15. Meropenem degradation in the presence and absence of RCS probe compounds  
90 [Experimental conditions: A) 100 mM AA, B) 10 mM BA; Ag/AgCl (3M NaCl) reference  
91 electrode].

92

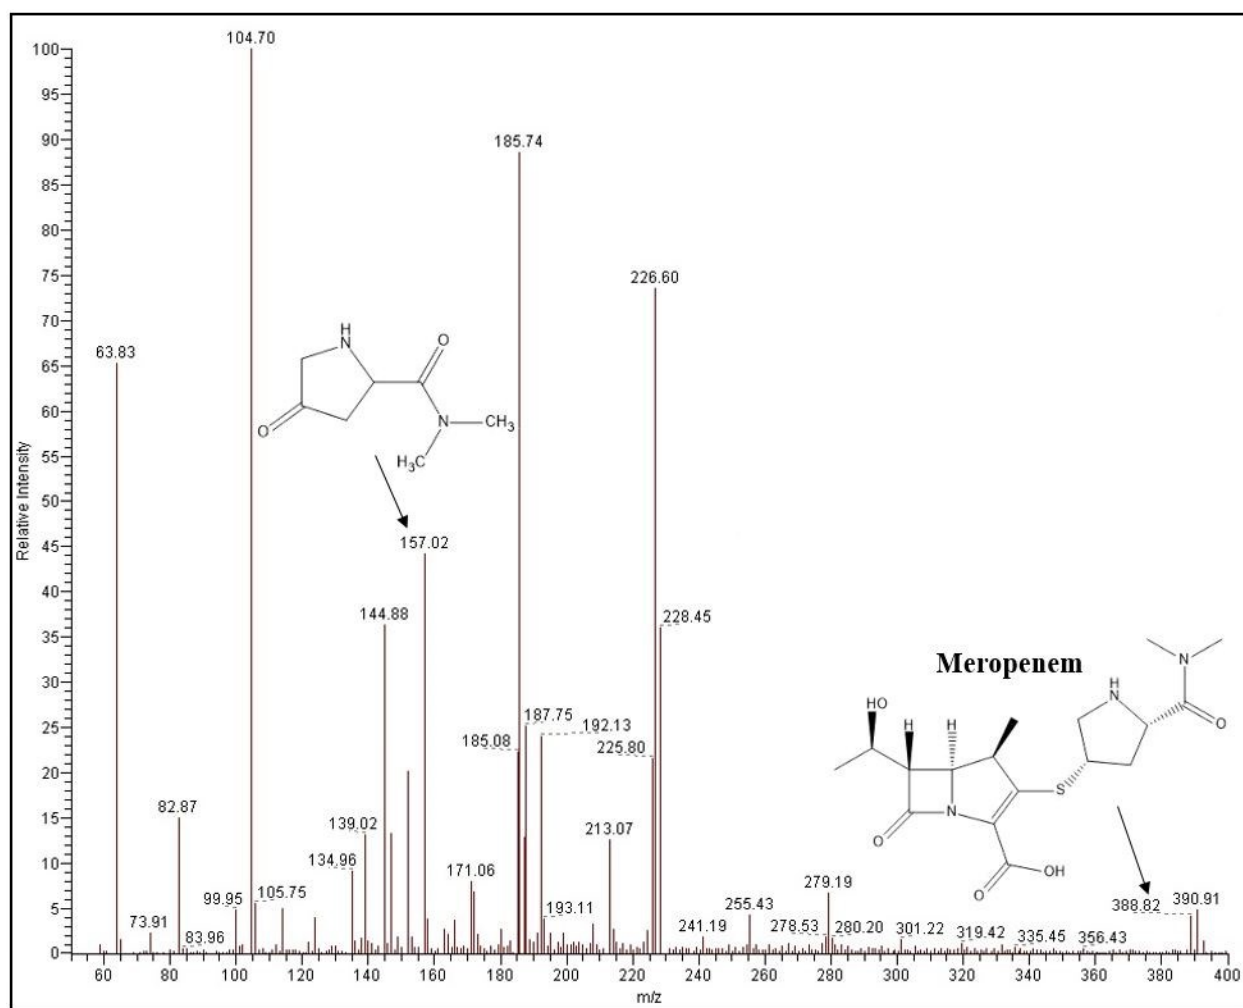

Figure S 16. LC/MS Spectrum of Meropenem transformation products in the positive EIS mode [M+H]<sup>+</sup>.

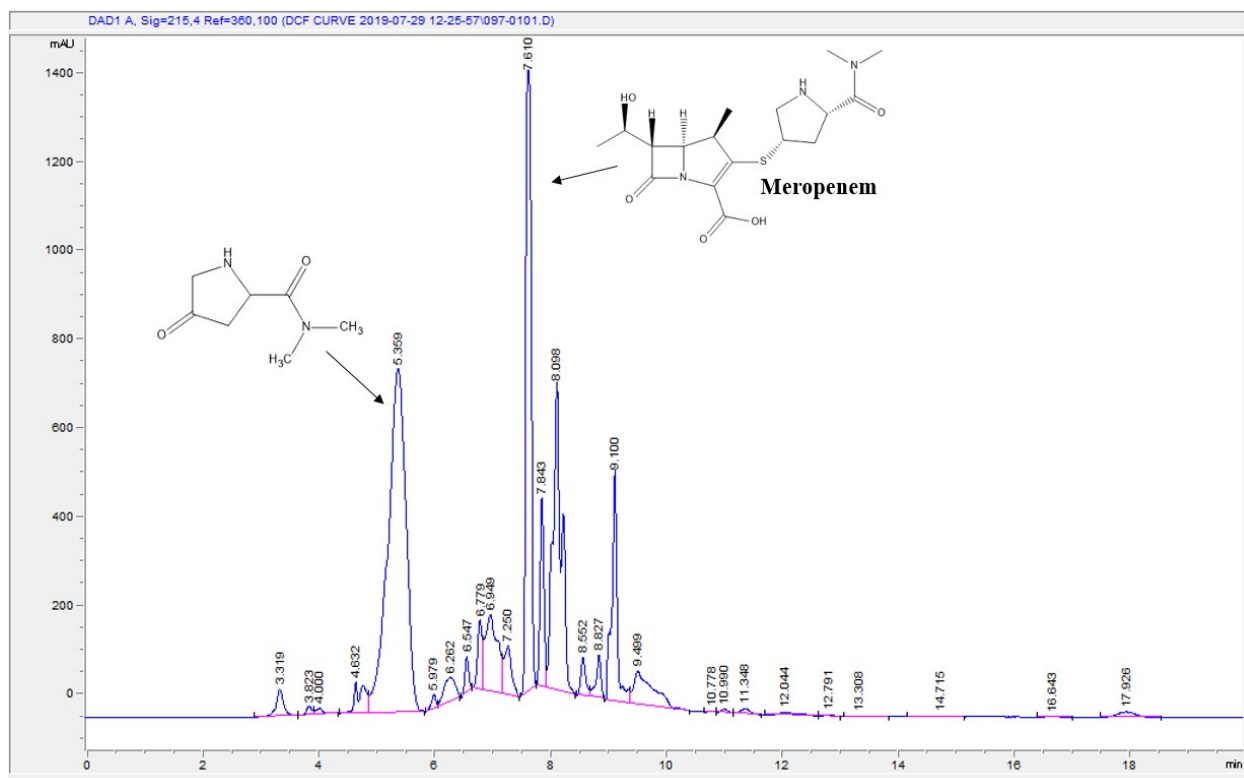

97

98 Figure S 17. HPLC/UV Spectra of Meropenem transformation products [Experimental conditions:  
 99 pH=7, 10 mA/cm<sup>2</sup>, Ag/AgCl, 15 mins electrolysis (3M NaCl) reference electrode].

100

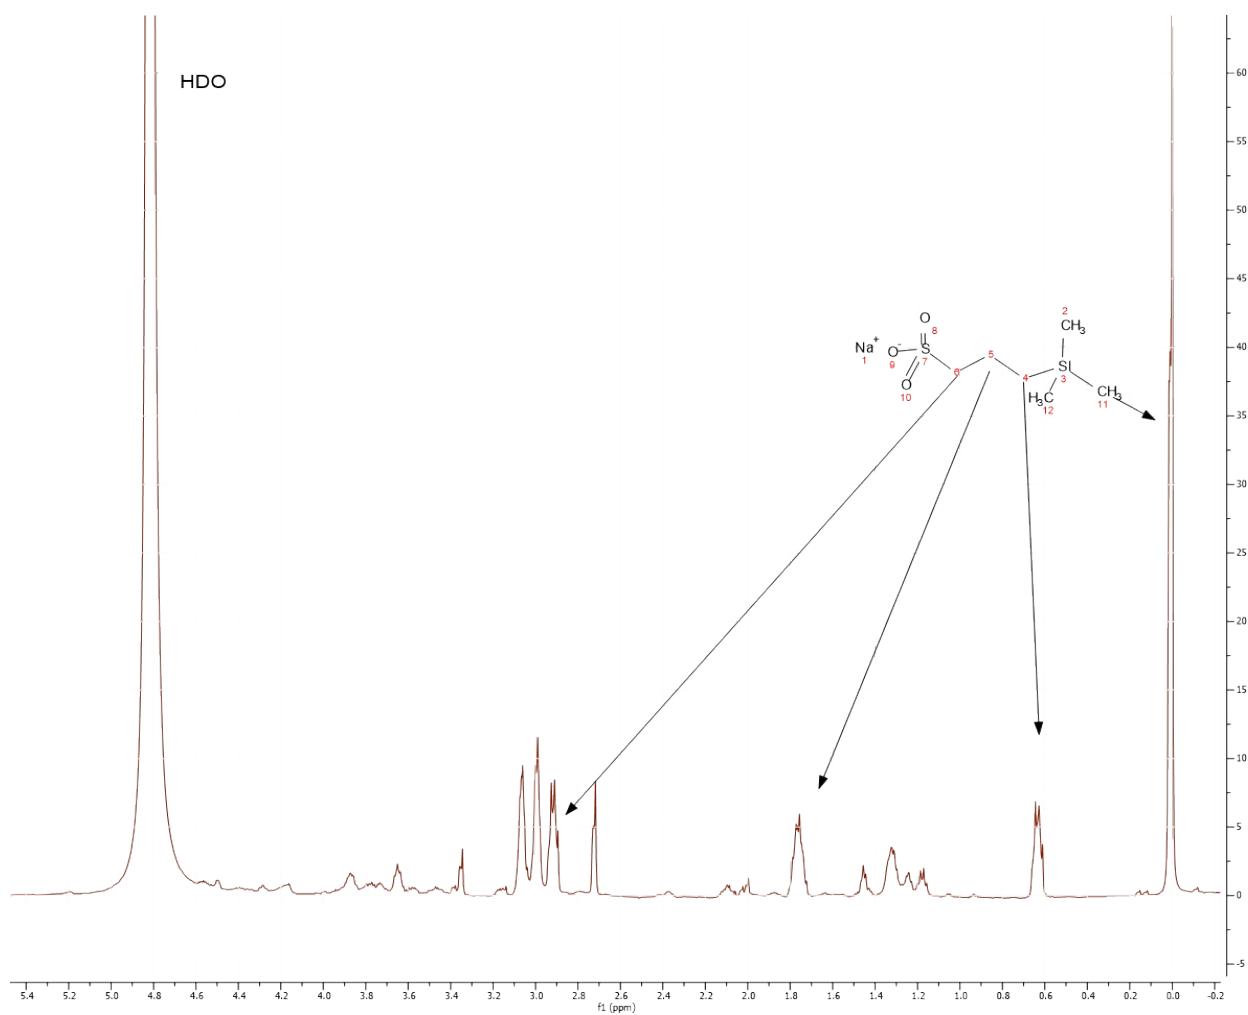

101

102 Figure S 18.  $^1\text{H}$ -NMR spectrum of peak # at 500 MHz

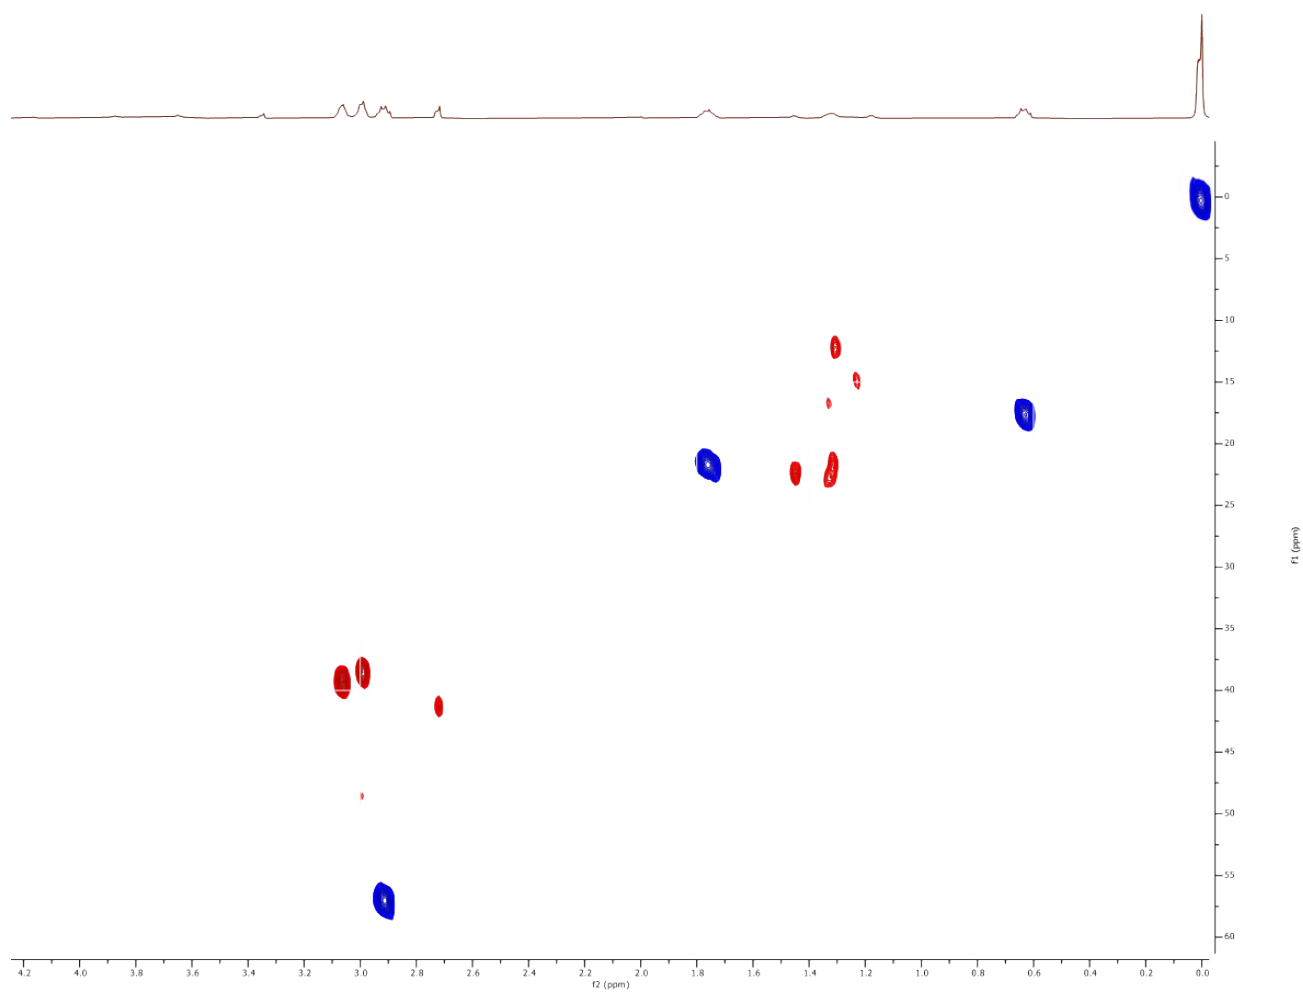

103

104 Figure S 19. HSQCSE spectrum of peak # at 500 MHz; blue peaks corresponding to DSS; red  
 105 peaks due to sample.

106

### 107 **Text S1**

108 Meropenem trihydrate was purchased from TCI (Tokyo Chemical Industry, Japan); Benzoic  
109 acid (BA), bismuth (III) nitrate pentahydrate, and ammonium fluoride were obtained from Alfa  
110 Aesar (Massachusetts, USA); Allyl Alcohol was purchased from Sigma-Aldrich (St. Louis,  
111 USA). Other reagents were obtained from Fisher Scientific. All chemicals are of analytical grade  
112 and were used without further purification.

113

### 114 **Text S2**

115 Titanium foil (0.1 mm, 99.6%) was cleaned by sonication in acetone and ethanol for 10  
116 minutes, respectively, followed by rinsing in deionized (DI) water and drying under ambient  
117 atmosphere. Then, Ti foil was anodized in an ethylene glycol (EG) electrolyte containing H<sub>2</sub>O (2.5  
118 wt%) and NH<sub>4</sub>F (0.2 wt%) for 16 hours under a constant voltage of 45 V at room temperature.  
119 Subsequently, the as-formed TiO<sub>2</sub> NTA layer is anodized under 60 V for 5 minutes in fluoride  
120 free electrolyte (5% H<sub>3</sub>PO<sub>4</sub> in EG solution) to enhance the physical stability of nanotube layer.  
121 A platinum mesh was used as the cathode in the anodization processes. After anodization, the  
122 electrode was washed with ethanol to remove remnants from the surface, and then dried naturally  
123 at room temperature.

124

### 125 **Text S3**

126 As shown in eqs. 1-2, the quasi steady-state concentration of  $\cdot\text{OH}$  ( $[\cdot\text{OH}]_{\text{ss}}$ ) during the  
127 electrolysis was estimated based on the pseudo first order rate constant of benzoic acid (BA) decay  
128 ( $K_{\text{BA}}$ ) in background electrolyte (30 mM NaClO<sub>4</sub>)<sup>1</sup>. The electrochemical behavior of BA on the  
129 surface of TiO<sub>2</sub> NTA-based electrodes was investigated using CV measurements (Figure S3).

$$\frac{d[BA]}{dt} = k_{BA,OH} [BA][\cdot OH] = k_{BA}[BA]$$

eq.1

$$[\cdot OH]_{SS} = \frac{k_{BA}}{k_{BA,OH}}$$

eq.2

#### Text S4

The concentration of Meropenem was measured using a high performance liquid chromatography (HPLC-Agilent 1100 series) with a diode array detector (DAD) at 290 nm with a Hypersil Gold 100 x 2.1 mm C18 column. The mobile phase was acetonitrile/KH<sub>2</sub>PO<sub>4</sub> (20:80, vol:vol%) with a flow rate of 0.2 mL/min. The benzoic acid concentration was determined using the same HPLC column at a wavelength of 210 nm with a mobile phase of 30:70, vol:vol;% of methano:water. Concentrations of ions (Cl<sup>-</sup>, SO<sub>4</sub><sup>2-</sup>, ClO<sub>3</sub><sup>-</sup>, NO<sub>3</sub><sup>-</sup>, PO<sub>4</sub><sup>3-</sup> and ClO<sub>4</sub><sup>-</sup>) were measured by an ion chromatography (Thermo Dionex ICS-1600 upgraded with the RFIC system) using an IonPac AS 19 anion-exchange column (4 x 250 mm), where the gradient elution was: 0→5 min (10 mM KOH), 5→10 min (10→18 mM KOH) and the flow rate was 1.0 ml/min.

#### Text S5

The peak at 530.06 eV is attributed to the O 1s, which is fitted with two peaks at 529.78 (Ti-O) and 531.28 eV(surface O-H) <sup>2</sup>. The Ti 2p spectra shows two peaks at 464.48 and 458.54 eV, which correspond to the Ti 2p<sub>1/2</sub> and Ti 2p<sub>3/2</sub>, respectively. These two peaks can be deconvoluted into two sets of peaks. One refers to the Ti<sup>3+</sup>, which is located at 458.58 and 463.76 eV, and the other applies to the Ti<sup>4+</sup> with binding energy at 464.58 and 458.68 eV <sup>2</sup>. The Co 2p pattern shows

152 two peaks at 786.28 and 780.58 eV, which were deconvoluted into three peaks centered at 786.18,  
153 781.88, and 780.48 eV. The peaks located at 781.88 and 780.48 eV are attributed to  $\text{Co}^{2+}$  and  $\text{Co}^{3+}$ ,  
154 respectively <sup>3</sup>. The peaks at the binding energy of 163.98 and 158.68 eV are assigned to the Bi  
155  $4f_{7/2}$  and Bi  $4f_{5/2}$ , respectively <sup>4</sup>.

156

## 157 **Text S6**

158 Effects of initial pH on Meropenem degradation and the pH evolution during the electrolysis  
159 in different reactor chambers are shown in Figure S8C, respectively. While a slightly better  
160 Meropenem removal was observed at pH 8 in the first 5 minutes than pH 7 or 5, overall initial pH  
161 exhibited minimum effects during the treatment. As shown in Figure S8A, pH in the anodic  
162 chamber dropped to ~3 within 2~3 min regardless of the initial value. High pH at the beginning of  
163 experiment may facilitate  $\text{OH}^-$  adsorption on the electrode surface and assist the oxidation of  
164 Meropenem via boosting  $\cdot\text{OH}$  generation<sup>28,42</sup>.

165

## 166 **Text S7**

167 Chloride mass balance in synthetic electrolyte and environmental matrices:

168 Synthetic electrolyte:

169 The Cl mass balance was conducted in the synthetic electrolyte to investigate the formation of  
170 chlorinated intermediate products from electrochemical oxidation of Meropenem. Here, 1.5 mM  
171  $\text{Na}_2\text{S}_3\text{O}_2$  was added to the samples taken at different time intervals to quench the residual active  
172 chlorine species, and then the samples were analyzed for chloride and chlorate (perchlorate was  
173 not detected). The Cl mass was then calculated from the concentration of chloride and chlorate.

174 The formation of chlorinated products was evaluated based on the difference between the initial  
175 Cl mass and the sum of Cl mass from chloride and chlorate during the electrolysis.

176 Environmental matrices:

177 In order to examine the generation of organic chlorinated byproducts and chlorine volatile  
178 species, Cl mass balance was examined in SE and RO concentrate. First, chloride and chlorate  
179 concentrations were measured immediately after the electrolysis of environmental matrices. Since  
180 there is a chance for free chlorine species to decompose to chloride, the concentration of chloride  
181 was monitored during the following three days after the experiment. Here  $\text{Na}_2\text{S}_3\text{O}_2$  was not used  
182 to react with free chlorine because it may also react with organic chlorinated byproducts such as  
183 organic chloramines. The difference between initial chloride (before electrolysis) and the sum of  
184 Cl mass in chlorate and chloride at the end may represent the formation of chlorinated byproducts  
185 and/or chlorine volatile species.

186

#### 187 **Text S8**

188 Energy consumption is an important concern for practical applications of electrochemical  
189 treatment. In this study, the  $E_{\text{EO}}$  value was calculated using eq. 3 and data from the batch  
190 experiments <sup>5</sup>.

$$E_{\text{EO}} = \frac{A \times I \times U \times t}{1000V \times \log\left(\frac{C_0}{C}\right)}$$

eq.

192 3

193 where  $E_{EO}$  is the electric energy consumed to degrade the concentration of Meropenem by one  
 194 order of magnitude in 1 m<sup>3</sup> wastewater (kWh/m<sup>3</sup>),  $A$  is the surface area (cm<sup>2</sup>),  $I$  is the applied  
 195 current density (A/cm<sup>2</sup>),  $U$  is the average overall potential (V),  $V$  is the volume of wastewater (m<sup>3</sup>),  
 196  $t$  is the time of electrolysis (hr), and  $C$  is the concentration of Meropenem (µg/L).

197

#### 198 **Text S9**

199 An empirical equation (eq. 4) was used to estimate the anodic lifetime of Co/Bi/TiO<sub>2</sub> NTA  
 200 electrode <sup>6,7</sup>.

$$201 \quad T_1 \times i_1^n = T_2 \times i_2^n \quad \text{eq. 4}$$

202 where,  $T$  is anodic lifetime of electrode at a constant current density ( $i$ ) and  $n$  is a coefficient  
 203 which can be calibrated with experimental data at different current densities. Here  $n = 2.135$  was  
 204 obtained based on the electrode lifetime at 120 and 200 mA/cm<sup>2</sup>.

205

206

207

208

209

210

211

212

213

214

215

216

217

## 218 References

- 219 1. Yang Y, Hoffmann MR. Synthesis and Stabilization of Blue-Black TiO<sub>2</sub> Nanotube Arrays  
220 for Electrochemical Oxidant Generation and Wastewater Treatment. *Environ Sci Technol*.  
221 2016;acs.est.6b03540. doi:10.1021/acs.est.6b03540.
- 222 2. Bharti B, Kumar S, Lee HN, Kumar R. Formation of oxygen vacancies and Ti<sup>3+</sup> state in  
223 TiO<sub>2</sub> thin film and enhanced optical properties by air plasma treatment. *Sci Rep*.  
224 2016;6(May):1-12. doi:10.1038/srep32355.
- 225 3. El Gaidoumi A, Loqman A, Benadallah AC, El Bali B, Kherbeche A. Co(II)-pyrophyllite  
226 as Catalyst for Phenol Oxidative Degradation: Optimization Study Using Response  
227 Surface Methodology. *Waste and Biomass Valorization*. 2019;10(4):1043-1051.  
228 doi:10.1007/s12649-017-0117-5.
- 229 4. Wan Y, Han M, Yu L, Yi G, Jia J. 3D Bi<sub>2</sub>S<sub>3</sub> salix leaf-like nanosheet/TiO<sub>2</sub> nanorod  
230 branched heterostructure arrays for improving photoelectrochemical properties.  
231 *CrystEngComm*. 2016;18(9):1577-1584. doi:10.1039/c5ce02252e.
- 232 5. Bolton JR, Bircher KG, Tumas W, Tolman CA. Figures-of-merit for the technical  
233 development and application of advanced oxidation technologies for both electric- and  
234 solar-driven systems. *Pure Appl Chem*. 2001;73(4):627-637.  
235 doi:10.1351/pac200173040627.
- 236 6. Hine F, Yasuda M, Noda T, Yoshida T, Okuda J. Electrochemical Behavior of the Oxide-  
237 Coated Metal Anodes. *J Electrochem Soc*. 1979;126(9):1439-1445.  
238 doi:10.1149/1.2129303.
- 239 7. Chen X, Chen G, Yue PL. Stable Ti/IrO<sub>x</sub>-Sb<sub>2</sub>O<sub>5</sub>-SnO<sub>2</sub> anode for O<sub>2</sub> evolution with low Ir  
240 content. *J Phys Chem B*. 2001;105(20):4623-4628. doi:10.1021/jp010038d.
- 241
